# Supplementary material
Source: PubMed Central journal article supplement (PMC5023324)
Supplement: NIHMS815337-supplement-Supplement.pdf [file NIHMS815337-supplement-Supplement.pdf]

## Supplementary Online Content

Mohanan M, Vera-Hernández M, Das V, et al. The know-do gap in quality of health care for childhood diarrhea and pneumonia in rural India. *JAMA Pediatr*. Published online February 16, 2015. doi: 10.1001/jamapediatrics.2014.3445

**eMethods.** Comparison of Findings From Restricted Sample Used in Text With Findings From Full Sample Where Possible

**eTable 1.** Recreating Table 2 in Text With All 396 Practitioners

**eTable 2.** Recreating Table 5 in Text With All 396 Practitioners

**eTable 3.** List of Questions That Are Common in Standardized Patients (SPs) and Vignettes

**eTable 4.** Practitioner Characteristics and Percentage of Diagnostic Questions Asked (Vignettes)

**eTable 5.** Fractional Logit of Practitioner Characteristics on Percentage of Diagnostic Questions Asked (Standardized Patient)

**eTable 6.** Knowledge Score and Practitioner Characteristics on Item Response Theory (IRT) Performance Score

**eFigure 1.** Consultation Time

**eFigure 2.** Know-Do Gap: Share of Practitioner Who Asked Key Diagnostic Questions on Standardized Patients (SPs) and Vignettes

This supplementary material has been provided by the authors to give readers additional information about their work.

## eMethods. Comparison of findings from restricted sample used in text with findings from full sample where possible.

In our paper (The Know-Do Gap in Quality of Care for Childhood Diarrhea and Pneumonia in India), we rely on data from 340 providers for whom we have complete data for the analysis. The original sample included 396 providers from 80 study clusters. We selected the five most frequently visited providers in each cluster for inclusion in the present study. One cluster had only four providers and another had only one provider, all of whom were included.

This is primarily because our analysis of know-do gap requires us to have data on treatment provided/prescribed by the providers to the SPs. In approximately 14% of cases (from a total of 396), we do not observe this treatment when providers asked the SP to return with the child. Note that – as mentioned in the paper - while many providers asked the SP to bring the child, most of them prescribed treatments anyway: (From the paper: “Although 23.6% asked the SP to return with the child for diarrhea, 92.7% still prescribed treatment (for pneumonia, 32.7% and 79.0%, respectively”).

Using data whenever available would lead to sample sizes that are not consistent through out the paper, so we rely on a restricted sample (340) where we have complete data from both instruments (vignettes and SP). However, such a restriction raises a potential concern that the two samples might not be comparable.

In this document, we compare findings from two key sets of analyses that uses the full sample whenever possible with the findings reported in the paper to document that **none of our key findings change with using the restricted sample and it enables us to use a consistent sample through out the paper.** (eTables using the full sample are attached at the end of this document: eTable 1 and eTable 2).

Compare, for example, the following results. In each case, we report results from the full sample and then results from the restricted sample in parenthesis:

### Comparing eTable 1 with Table 2 in article:

- Questions asked on diarrhea & pneumonia vignettes
  - i. Fever: 20.4% with 396 providers (20% with 340 providers)
  - ii. Blood in stools: 12.8% with 396 providers (13.2% with 340)
  - iii. Worms in stools: 6.06% with 396 providers (6.2% with 340)
  - iv. Correct treatment for diarrhea, if any: 3.8% for 396 providers, 3.6% for 340.
  - v. Rapid breathing: 24.2% with 396 providers (24.1% with 340)
  - vi. Skin between ribs moving: 14.4% with 396 providers (13.8% with 340)
  - vii. Correct treatment for pneumonia, if any: 9.09% for 396 providers; 9.3% for 340 providers
- The visit length and number of medicines for SP interactions was similar for both samples: Mean visit length was 1.54 minutes (1.6 min with 340 providers) for diarrhea, and 2.73 minutes (2.9 using 340 providers). Similarly, number of medicines was 1.72 and 2.03 (1.8 and 2.2 using 340 providers).

### Comparing eTable 2 with Table 5 in article:

- All of the key findings from regressions in the paper remain unchanged with the restriction as well.

| Provider Charc.         | 396 providers<br>coeff (*, **, ***) | 340 providers<br>coeff (*, **, ***) |
|-------------------------|-------------------------------------|-------------------------------------|
| Public facility (diarr) | -0.116 *                            | -0.161 ***                          |
| Public facility (pneum) | -0.214 ***                          | -0.249 ***                          |
| Working hours (diarr)   | -0.001*                             | -0.002 ***                          |
| Working hours (pneum)   | -0.002**                            | -0.003 **                           |
| No Medical Qual (diarr) | 0.050                               | 0.060                               |
| No Medical Qual (pneum) | 0.084**                             | -0.084 **                           |

Since regressions in last two columns in table 5 (OR for logistic regression of harmful treatments provided), the analysis can only include 340 providers for whom we have data on treatment provided.

**eTable 1. Recreating Table 2 in text with all 396 practitioners**

| <b>Diarrhea</b>                                         | <b>Share of providers (%)</b> | <b>Pneumonia</b>                                                                  | <b>Share of providers (%)</b> |
|---------------------------------------------------------|-------------------------------|-----------------------------------------------------------------------------------|-------------------------------|
| <b>Questions and Examinations</b>                       |                               | <b>Questions and Examinations</b>                                                 |                               |
| Does the child have fever/Is the child warm             | 20.45                         | Is it a high fever                                                                | 32.32                         |
| Is the urine normal /urine color                        | 7.32                          | Is the cough continuous                                                           | 17.17                         |
| When did the child last urinate                         | 6.82                          | Does the cough increase at night                                                  | 8.84                          |
| Nature of stool                                         | 58.08                         | Did both fever and cough start five days ago                                      | 10.1                          |
| Frequency of stool                                      | 44.95                         | Does he have a runny nose/is his nose blocked                                     | 7.32                          |
| Quantity of stool                                       | 12.63                         | Does he have any vomiting                                                         | 11.11                         |
| Blood or mucus in the stools                            | 12.88                         | Has he been breathing rapidly                                                     | 24.24                         |
| Worms in stools                                         | 6.06                          | Does his nostrils appear to be flaring when he is breathing                       | 9.85                          |
| Foul smelling                                           | 10.61                         | Noticed skin between his ribs, or his/her tummy move inwards when he breathes     | 14.39                         |
| Does he complain of stomach ache                        | 16.16                         | Any particular sounds that he made since he started having difficulty breathing   | 1.26                          |
| Does he cry while passing stools                        | 6.06                          | Has he had breathlessness in the past                                             | 5.56                          |
| Is the child weak now                                   | 8.08                          | Weight of child                                                                   | 6.57                          |
| Vomiting                                                | 51.52                         | Respiration rate                                                                  | 5.05                          |
| Is the child drinking a lot of water - how many glasses | 20.96                         | Auscultation of chest and heart                                                   | 12.37                         |
| Is the child teething                                   | 6.82                          | Pulse rate                                                                        | 5.81                          |
| Weight of child                                         | 7.32                          | Temperature                                                                       | 19.44                         |
| Temperature                                             | 7.83                          | Examination of chest                                                              | 10.1                          |
| Mucous membranes for moistness                          | 4.8                           | Chest x-ray                                                                       | 8.33                          |
| Skin color and turgor                                   | 5.81                          | TLC                                                                               | 8.33                          |
| Palpation of the abdomen                                | 7.07                          | WBC differential (neutrophils, basophils, eosinophils, lymphocytes and monocytes) | 10.35                         |
| <b>Other questions</b>                                  |                               | <b>Other questions</b>                                                            |                               |
| Has expressed not to give antibiotics when s/he did     | 13.46                         | Has expressed not to give antibiotics when s/he did                               | 0.9                           |
| <b>Diagnosis</b>                                        |                               | <b>Diagnosis</b>                                                                  |                               |
| Gave any diagnosis                                      | 98.74                         | Gave any diagnosis                                                                | 97.22                         |
| Correct diagnosis                                       | 73.23                         | Correct diagnosis                                                                 | 57.07                         |
| Correct diagnosis, if any                               | 74.17                         | Correct diagnosis, if any                                                         | 58.7                          |
| <b>Treatment</b>                                        |                               | <b>Treatment</b>                                                                  |                               |
| Gave any treatment                                      | 98.99                         | Gave any treatment                                                                | 94.44                         |
| Correct treatment                                       | 3.79                          | Correct treatment                                                                 | 8.59                          |
| Correct Treatment, if any                               | 3.83                          | Correct Treatment, if any                                                         | 9.09                          |
| Source: Vignette survey. Observations: 396              |                               |                                                                                   |                               |

Indicates fraction of providers who asked or performed key diagnostic questions and examinations, diagnosis and treatment - vignette

**eTable 2. Recreating Table 5 in text with all 396 practitioners**

| Variables                                                                                                                                                                                                                                                                                                                                                                                                                                                                                                                                                                                                                                                                                                                                                                                                                                                                                                           | Diarrhea |         | Pneumonia |           |
|---------------------------------------------------------------------------------------------------------------------------------------------------------------------------------------------------------------------------------------------------------------------------------------------------------------------------------------------------------------------------------------------------------------------------------------------------------------------------------------------------------------------------------------------------------------------------------------------------------------------------------------------------------------------------------------------------------------------------------------------------------------------------------------------------------------------------------------------------------------------------------------------------------------------|----------|---------|-----------|-----------|
|                                                                                                                                                                                                                                                                                                                                                                                                                                                                                                                                                                                                                                                                                                                                                                                                                                                                                                                     |          |         |           |           |
| Age [20,29]                                                                                                                                                                                                                                                                                                                                                                                                                                                                                                                                                                                                                                                                                                                                                                                                                                                                                                         | 0.078    | 0.064   | -0.099**  | -0.091*   |
|                                                                                                                                                                                                                                                                                                                                                                                                                                                                                                                                                                                                                                                                                                                                                                                                                                                                                                                     | (0.061)  | (0.054) | (0.045)   | (0.046)   |
| Age [40,49]                                                                                                                                                                                                                                                                                                                                                                                                                                                                                                                                                                                                                                                                                                                                                                                                                                                                                                         | -0.010   | -0.012  | 0.021     | 0.016     |
|                                                                                                                                                                                                                                                                                                                                                                                                                                                                                                                                                                                                                                                                                                                                                                                                                                                                                                                     | (0.036)  | (0.035) | (0.034)   | (0.034)   |
| Age [50,59]                                                                                                                                                                                                                                                                                                                                                                                                                                                                                                                                                                                                                                                                                                                                                                                                                                                                                                         | -0.009   | -0.015  | 0.044     | 0.034     |
|                                                                                                                                                                                                                                                                                                                                                                                                                                                                                                                                                                                                                                                                                                                                                                                                                                                                                                                     | (0.047)  | (0.047) | (0.051)   | (0.057)   |
| Age [60+]                                                                                                                                                                                                                                                                                                                                                                                                                                                                                                                                                                                                                                                                                                                                                                                                                                                                                                           | 0.053    | 0.037   | 0.119*    | 0.076     |
|                                                                                                                                                                                                                                                                                                                                                                                                                                                                                                                                                                                                                                                                                                                                                                                                                                                                                                                     | (0.074)  | (0.076) | (0.061)   | (0.072)   |
| Experience                                                                                                                                                                                                                                                                                                                                                                                                                                                                                                                                                                                                                                                                                                                                                                                                                                                                                                          | 0.000    | 0.000   | -0.004**  | -0.004*   |
|                                                                                                                                                                                                                                                                                                                                                                                                                                                                                                                                                                                                                                                                                                                                                                                                                                                                                                                     | (0.002)  | (0.002) | (0.002)   | (0.002)   |
| Medical Qualification                                                                                                                                                                                                                                                                                                                                                                                                                                                                                                                                                                                                                                                                                                                                                                                                                                                                                               | 0.028    | 0.050   | -0.089**  | -0.084**  |
|                                                                                                                                                                                                                                                                                                                                                                                                                                                                                                                                                                                                                                                                                                                                                                                                                                                                                                                     | (0.033)  | (0.035) | (0.036)   | (0.036)   |
| Working hours                                                                                                                                                                                                                                                                                                                                                                                                                                                                                                                                                                                                                                                                                                                                                                                                                                                                                                       |          | -0.001* |           | -0.002**  |
|                                                                                                                                                                                                                                                                                                                                                                                                                                                                                                                                                                                                                                                                                                                                                                                                                                                                                                                     |          | (0.001) |           | (0.001)   |
| Avg. patient caseload                                                                                                                                                                                                                                                                                                                                                                                                                                                                                                                                                                                                                                                                                                                                                                                                                                                                                               |          | -0.002* |           | 0.000     |
|                                                                                                                                                                                                                                                                                                                                                                                                                                                                                                                                                                                                                                                                                                                                                                                                                                                                                                                     |          | (0.001) |           | (0.002)   |
| Run camps                                                                                                                                                                                                                                                                                                                                                                                                                                                                                                                                                                                                                                                                                                                                                                                                                                                                                                           |          | -0.010  |           | 0.039     |
|                                                                                                                                                                                                                                                                                                                                                                                                                                                                                                                                                                                                                                                                                                                                                                                                                                                                                                                     |          | (0.059) |           | (0.053)   |
| Public Health facility                                                                                                                                                                                                                                                                                                                                                                                                                                                                                                                                                                                                                                                                                                                                                                                                                                                                                              |          | -0.116* |           | -0.214*** |
|                                                                                                                                                                                                                                                                                                                                                                                                                                                                                                                                                                                                                                                                                                                                                                                                                                                                                                                     |          | (0.060) |           | (0.039)   |
| Clinic's level of cleanliness                                                                                                                                                                                                                                                                                                                                                                                                                                                                                                                                                                                                                                                                                                                                                                                                                                                                                       |          | -0.013  |           | 0.054**   |
|                                                                                                                                                                                                                                                                                                                                                                                                                                                                                                                                                                                                                                                                                                                                                                                                                                                                                                                     |          | (0.021) |           | (0.021)   |
| Knowledge Score                                                                                                                                                                                                                                                                                                                                                                                                                                                                                                                                                                                                                                                                                                                                                                                                                                                                                                     |          | 0.016** |           | 0.010     |
|                                                                                                                                                                                                                                                                                                                                                                                                                                                                                                                                                                                                                                                                                                                                                                                                                                                                                                                     |          | (0.007) |           | (0.008)   |
| Observations                                                                                                                                                                                                                                                                                                                                                                                                                                                                                                                                                                                                                                                                                                                                                                                                                                                                                                        | 191      | 185     | 179       | 171       |
| R2                                                                                                                                                                                                                                                                                                                                                                                                                                                                                                                                                                                                                                                                                                                                                                                                                                                                                                                  | 0.049    | 0.122   | 0.118     | 0.195     |
| <p><b>Indicates regression analysis of provider characteristics on percentage of diagnostic questions.</b><br/> <b>Notes:</b> Experience variable accounts for the years of experience of the provider as a medical practitioner. Medically Qualified providers include those with any formal medical degree (MBBS, BAMS, BUMS, BHMS degrees as well as Diploma in Ayurvedic and some others MD degrees). Working hours is the total number of hours the provider works in the facility in a week. Average patient caseload is the average of the number of patients the providers report to attend in a day in winter, summer and post-monsoon period. Knowledge score is based on providers' responses to 12 key questions listed in eTable 1. Estimations adjusted by the time and day of the week of the consultation. Sources: SPP Exit Interview, Vignette and Provider Questionnaire. Observations: 396.</p> |          |         |           |           |

**eTable 3. List of questions that are common in the standardized patients (SPs) and vignettes**

|                                                                                                            | Question in SP                                                                                     | Question(s) in Vignettes                                                                                                                                                                                                                                                                                                                              |
|------------------------------------------------------------------------------------------------------------|----------------------------------------------------------------------------------------------------|-------------------------------------------------------------------------------------------------------------------------------------------------------------------------------------------------------------------------------------------------------------------------------------------------------------------------------------------------------|
| <b>Panel A: Diarrhea</b>                                                                                   |                                                                                                    |                                                                                                                                                                                                                                                                                                                                                       |
| 1                                                                                                          | Qualities of stool                                                                                 | Nature of stool<br>Blood/mucus in the stools<br>Worms in stools<br>Foul smelling                                                                                                                                                                                                                                                                      |
| 2                                                                                                          | Frequency                                                                                          | Frequency of stool                                                                                                                                                                                                                                                                                                                                    |
| 3                                                                                                          | Quantity of stool                                                                                  | Quantity of stool                                                                                                                                                                                                                                                                                                                                     |
| 4                                                                                                          | Questions about urination                                                                          | Is the urine normal/urine color?<br>When did the child last urinate?                                                                                                                                                                                                                                                                                  |
| 5                                                                                                          | Is the child active/playful?                                                                       | Is the child weak now?                                                                                                                                                                                                                                                                                                                                |
| 6                                                                                                          | Fever                                                                                              | Does the child have fever? Is the child? warm                                                                                                                                                                                                                                                                                                         |
| 7                                                                                                          | Abdominal pain                                                                                     | Does he complain of stomach ache?                                                                                                                                                                                                                                                                                                                     |
| 8                                                                                                          | Vomiting                                                                                           | Vomiting?                                                                                                                                                                                                                                                                                                                                             |
| 9                                                                                                          | Source of drinking water?<br>Boiling water? From tap? How is it stored?                            | Where do you get your drinking water from?<br>Do you boil drinking water?                                                                                                                                                                                                                                                                             |
| 10                                                                                                         | What has the child eaten?                                                                          | What are his feeding habits?<br>Is the child eating normally?                                                                                                                                                                                                                                                                                         |
| 11                                                                                                         | Taking fluids                                                                                      | Is the child drinking a lot of water? How many glasses of water does he drink?                                                                                                                                                                                                                                                                        |
| 12                                                                                                         | Physical Environment                                                                               | Do you have a toilet in your house or do you go to the fields?<br>Is your house a pucca or kachha house?<br>Does the child eat mud or does the child play in the mud?                                                                                                                                                                                 |
| <b>Panel B: Pneumonia</b>                                                                                  |                                                                                                    |                                                                                                                                                                                                                                                                                                                                                       |
| 1                                                                                                          | Fever                                                                                              | Is it a high fever?<br>Did both fever and cough start five days ago?                                                                                                                                                                                                                                                                                  |
| 2                                                                                                          | Breathing is rapid                                                                                 | Has he been breathing rapidly?                                                                                                                                                                                                                                                                                                                        |
| 3                                                                                                          | Difficulty in breathing/nostrils flaring/skin between ribs moves inwards/neck muscles are strained | Does his nostrils appear to be flaring when he is breathing?<br>Have you noticed if skin between his ribs, or his/her tummy move inwards when he breathes?<br>Have you noticed if his neck muscles are straining or standing out more<br>You mentioned he had difficulty in breathing has that been getting progressively worse over the past 5 days? |
| 4                                                                                                          | Type of cough                                                                                      | Is the cough continuous?<br>Does the cough increase at night?                                                                                                                                                                                                                                                                                         |
| 5                                                                                                          | Runny nose or nose blocked                                                                         | Does he have a runny nose or is his nose blocked?                                                                                                                                                                                                                                                                                                     |
| 6                                                                                                          | Sounds while breathing                                                                             | Any particular sounds that he made since he started having difficulty breathing?                                                                                                                                                                                                                                                                      |
| 7                                                                                                          | Change in color of fingernails, hand, toes                                                         | Did you notice if his fingernails, hands or toes changed color?                                                                                                                                                                                                                                                                                       |
| 8                                                                                                          | Child is weak                                                                                      | Is the child weak now?                                                                                                                                                                                                                                                                                                                                |
| 9                                                                                                          | Breastfeeding/immunization history                                                                 | Has he had breathlessness in the past?<br>How long was he breastfed?<br>Was he fully immunized. Did he get his mmr vaccine?                                                                                                                                                                                                                           |
| 10                                                                                                         | History of asthma/allergies                                                                        | Does he have any allergies?<br>Does anyone in your family suffer from asthma?                                                                                                                                                                                                                                                                         |
| 11                                                                                                         | Have a chula at home                                                                               | Do you have a chula at home?                                                                                                                                                                                                                                                                                                                          |
| 12                                                                                                         | Other children have similar fever/cough                                                            | Did the children he plays with have similar fever and cough?                                                                                                                                                                                                                                                                                          |
| Source: SSP Exit Interview and Vignettes Survey. Observation: 178 for diarrhea case and 162 for Pneumonia. |                                                                                                    |                                                                                                                                                                                                                                                                                                                                                       |

**eTable 4. Practitioner characteristics and percentage of diagnostic questions asked (vignettes)**

|                                                                                                                                                                                                                                                                                                                                                                                                                                                                                                                                                                                                                                                                                                                                                                                                      | Estimated effect (95% CI) <sup>a</sup> | p value |  | Estimated effect (95% CI) <sup>a</sup> | p value |
|------------------------------------------------------------------------------------------------------------------------------------------------------------------------------------------------------------------------------------------------------------------------------------------------------------------------------------------------------------------------------------------------------------------------------------------------------------------------------------------------------------------------------------------------------------------------------------------------------------------------------------------------------------------------------------------------------------------------------------------------------------------------------------------------------|----------------------------------------|---------|--|----------------------------------------|---------|
| <b>Panel A: Diarrhea</b>                                                                                                                                                                                                                                                                                                                                                                                                                                                                                                                                                                                                                                                                                                                                                                             |                                        |         |  |                                        |         |
| Age [20,29]                                                                                                                                                                                                                                                                                                                                                                                                                                                                                                                                                                                                                                                                                                                                                                                          | 0.032 (-0.059,0.124)                   | 0.487   |  | 0.046 (-0.005,0.098)                   | 0.079   |
| Age [40,49]                                                                                                                                                                                                                                                                                                                                                                                                                                                                                                                                                                                                                                                                                                                                                                                          | -0.003 (-0.068,0.061)                  | 0.922   |  | -0.002 (-0.037,0.033)                  | 0.908   |
| Age [50,59]                                                                                                                                                                                                                                                                                                                                                                                                                                                                                                                                                                                                                                                                                                                                                                                          | -0.048 (-0.121,0.025)                  | 0.194   |  | -0.017 (-0.065,0.031)                  | 0.478   |
| Age [60+]                                                                                                                                                                                                                                                                                                                                                                                                                                                                                                                                                                                                                                                                                                                                                                                            | -0.096 (-0.193,0.002)                  | 0.055   |  | -0.051 (-0.116,0.015)                  | 0.129   |
| Experience                                                                                                                                                                                                                                                                                                                                                                                                                                                                                                                                                                                                                                                                                                                                                                                           | 0.001 (-0.003,0.004)                   | 0.739   |  | 0.001 (-0.001,0.004)                   | 0.202   |
| Medical Qualification                                                                                                                                                                                                                                                                                                                                                                                                                                                                                                                                                                                                                                                                                                                                                                                | 0.007 (-0.029,0.043)                   | 0.684   |  | -0.020 (-0.048,0.008)                  | 0.151   |
| Working hours                                                                                                                                                                                                                                                                                                                                                                                                                                                                                                                                                                                                                                                                                                                                                                                        |                                        |         |  | 0.001 (-0.000,0.001)                   | 0.152   |
| Avg. patient caseload                                                                                                                                                                                                                                                                                                                                                                                                                                                                                                                                                                                                                                                                                                                                                                                |                                        |         |  | 0.002 (0.000,0.003)                    | 0.018   |
| Run camps                                                                                                                                                                                                                                                                                                                                                                                                                                                                                                                                                                                                                                                                                                                                                                                            |                                        |         |  | -0.017 (-0.059,0.025)                  | 0.413   |
| Public Health facility                                                                                                                                                                                                                                                                                                                                                                                                                                                                                                                                                                                                                                                                                                                                                                               |                                        |         |  | -0.014 (-0.084,0.055)                  | 0.686   |
| Clinic's level of cleanliness                                                                                                                                                                                                                                                                                                                                                                                                                                                                                                                                                                                                                                                                                                                                                                        |                                        |         |  | 0.022 (0.000,0.045)                    | 0.049   |
| Knowledge Score                                                                                                                                                                                                                                                                                                                                                                                                                                                                                                                                                                                                                                                                                                                                                                                      |                                        |         |  | 0.105 (0.094,0.115)                    | 0.000   |
| <b>Panel B: Pneumonia</b>                                                                                                                                                                                                                                                                                                                                                                                                                                                                                                                                                                                                                                                                                                                                                                            |                                        |         |  |                                        |         |
| Age [20,29]                                                                                                                                                                                                                                                                                                                                                                                                                                                                                                                                                                                                                                                                                                                                                                                          | -0.130 (-0.184,-0.076)                 | 0.000   |  | 0.006 (-0.026,0.039)                   | 0.704   |
| Age [40,49]                                                                                                                                                                                                                                                                                                                                                                                                                                                                                                                                                                                                                                                                                                                                                                                          | 0.004 (-0.060,0.069)                   | 0.897   |  | -0.011 (-0.046,0.024)                  | 0.531   |
| Age [50,59]                                                                                                                                                                                                                                                                                                                                                                                                                                                                                                                                                                                                                                                                                                                                                                                          | 0.024 (-0.086,0.133)                   | 0.669   |  | 0.003 (-0.052,0.058)                   | 0.925   |
| Age [60+]                                                                                                                                                                                                                                                                                                                                                                                                                                                                                                                                                                                                                                                                                                                                                                                            | -0.013 (-0.124,0.098)                  | 0.815   |  | -0.016 (-0.078,0.045)                  | 0.599   |
| Experience                                                                                                                                                                                                                                                                                                                                                                                                                                                                                                                                                                                                                                                                                                                                                                                           | -0.002 (-0.005,0.002)                  | 0.391   |  | 0.000 (-0.002,0.002)                   | 0.929   |
| Medical Qualification                                                                                                                                                                                                                                                                                                                                                                                                                                                                                                                                                                                                                                                                                                                                                                                | 0.023 (-0.034,0.080)                   | 0.417   |  | 0.011 (-0.019,0.041)                   | 0.461   |
| Working hours                                                                                                                                                                                                                                                                                                                                                                                                                                                                                                                                                                                                                                                                                                                                                                                        |                                        |         |  | 0.000 (-0.001,0.001)                   | 0.579   |
| Avg. patient caseload                                                                                                                                                                                                                                                                                                                                                                                                                                                                                                                                                                                                                                                                                                                                                                                |                                        |         |  | 0.000 (-0.002,0.002)                   | 0.971   |
| Run camps                                                                                                                                                                                                                                                                                                                                                                                                                                                                                                                                                                                                                                                                                                                                                                                            |                                        |         |  | -0.032 (-0.087,0.023)                  | 0.247   |
| Public Health facility                                                                                                                                                                                                                                                                                                                                                                                                                                                                                                                                                                                                                                                                                                                                                                               |                                        |         |  | 0.094 (-0.015,0.203)                   | 0.089   |
| Clinic's level of cleanliness                                                                                                                                                                                                                                                                                                                                                                                                                                                                                                                                                                                                                                                                                                                                                                        |                                        |         |  | 0.006 (-0.018,0.029)                   | 0.633   |
| Knowledge Score                                                                                                                                                                                                                                                                                                                                                                                                                                                                                                                                                                                                                                                                                                                                                                                      |                                        |         |  | 0.125 (0.113,0.137)                    | 0.000   |
| <p><b>Notes:</b> Experience variable accounts for the years of experience of the provider as a medical practitioner. Medically Qualified providers include those with any formal medical degree (MBBS, BAMS, BUMS, BHMS degrees as well as Diploma in Ayurvedic and some others MD degrees). Working hours is the total number of hours the provider works in the facility in a week. Average patient caseload is the average of the number of patients the providers report to attend in a day in winter, summer and post- monsoon period. Knowledge score is based on providers' responses to 12 key questions listed in eTable 1.</p> <p><sup>a</sup> Adjusted for the time and day of the week of the consultation.</p> <p>Sources: SPP Exit Interview, Vignette and Provider Questionnaire.</p> |                                        |         |  |                                        |         |

**eTable 5. Fractional logit of practitioner characteristics on percentage of diagnostic questions asked (standardized patient)**

|                                                                                                                                                                                                                                                                                                                                                                                                                                                                                                                                                                                                                                                                                                                                                                            | Marginal effects (95% CI)† | p value | Marginal effects (95% CI)† | p value |
|----------------------------------------------------------------------------------------------------------------------------------------------------------------------------------------------------------------------------------------------------------------------------------------------------------------------------------------------------------------------------------------------------------------------------------------------------------------------------------------------------------------------------------------------------------------------------------------------------------------------------------------------------------------------------------------------------------------------------------------------------------------------------|----------------------------|---------|----------------------------|---------|
| <b>Panel A: Diarrhea</b>                                                                                                                                                                                                                                                                                                                                                                                                                                                                                                                                                                                                                                                                                                                                                   |                            |         |                            |         |
| Age [20,29]                                                                                                                                                                                                                                                                                                                                                                                                                                                                                                                                                                                                                                                                                                                                                                | 0.076 (-0.052,0.205)       | 0.245   | 0.060 (-0.046,0.166)       | 0.266   |
| Age [40,49]                                                                                                                                                                                                                                                                                                                                                                                                                                                                                                                                                                                                                                                                                                                                                                | -0.008 (-0.087,0.071)      | 0.844   | 0.003 (-0.067,0.074)       | 0.929   |
| Age [50,59]                                                                                                                                                                                                                                                                                                                                                                                                                                                                                                                                                                                                                                                                                                                                                                | -0.011 (-0.103,0.081)      | 0.814   | -0.013 (-0.095,0.069)      | 0.760   |
| Age [60+]                                                                                                                                                                                                                                                                                                                                                                                                                                                                                                                                                                                                                                                                                                                                                                  | 0.078 (-0.082,0.238)       | 0.340   | 0.056 (-0.092,0.204)       | 0.457   |
| Experience                                                                                                                                                                                                                                                                                                                                                                                                                                                                                                                                                                                                                                                                                                                                                                 | -0.000 (-0.004,0.004)      | 0.920   | 0.000 (-0.003,0.004)       | 0.839   |
| Medical Qualification                                                                                                                                                                                                                                                                                                                                                                                                                                                                                                                                                                                                                                                                                                                                                      | 0.041 (-0.027,0.109)       | 0.238   | 0.063 (-0.010,0.135)       | 0.090   |
| Working hours                                                                                                                                                                                                                                                                                                                                                                                                                                                                                                                                                                                                                                                                                                                                                              |                            |         | -0.002 (-0.004,-0.001)     | 0.001   |
| Avg. patient caseload                                                                                                                                                                                                                                                                                                                                                                                                                                                                                                                                                                                                                                                                                                                                                      |                            |         | -0.002 (-0.005,0.001)      | 0.124   |
| Run camps                                                                                                                                                                                                                                                                                                                                                                                                                                                                                                                                                                                                                                                                                                                                                                  |                            |         | 0.038 (-0.083,0.158)       | 0.540   |
| Public Health facility                                                                                                                                                                                                                                                                                                                                                                                                                                                                                                                                                                                                                                                                                                                                                     |                            |         | -0.131 (-0.190,-0.072)     | 0.000   |
| Clinic's level of cleanliness                                                                                                                                                                                                                                                                                                                                                                                                                                                                                                                                                                                                                                                                                                                                              |                            |         | -0.011 (-0.053,0.031)      | 0.594   |
| Knowledge Score                                                                                                                                                                                                                                                                                                                                                                                                                                                                                                                                                                                                                                                                                                                                                            |                            |         | 0.034 (0.012,0.056)        | 0.003   |
| <b>Panel B: Pneumonia</b>                                                                                                                                                                                                                                                                                                                                                                                                                                                                                                                                                                                                                                                                                                                                                  |                            |         |                            |         |
| Age [20,29]                                                                                                                                                                                                                                                                                                                                                                                                                                                                                                                                                                                                                                                                                                                                                                | -0.104 (-0.175,-0.033)     | 0.004   | -0.101 (-0.178,-0.025)     | 0.010   |
| Age [40,49]                                                                                                                                                                                                                                                                                                                                                                                                                                                                                                                                                                                                                                                                                                                                                                | -0.005 (-0.076,0.065)      | 0.881   | 0.004 (-0.068,0.076)       | 0.910   |
| Age [50,59]                                                                                                                                                                                                                                                                                                                                                                                                                                                                                                                                                                                                                                                                                                                                                                | 0.031 (-0.070,0.131)       | 0.549   | 0.040 (-0.071,0.151)       | 0.481   |
| Age [60+]                                                                                                                                                                                                                                                                                                                                                                                                                                                                                                                                                                                                                                                                                                                                                                  | 0.104 (-0.023,0.231)       | 0.107   | 0.077 (-0.069,0.223)       | 0.303   |
| Experience                                                                                                                                                                                                                                                                                                                                                                                                                                                                                                                                                                                                                                                                                                                                                                 | -0.004 (-0.008,-0.000)     | 0.030   | -0.004 (-0.008,-0.000)     | 0.047   |
| Medical Qualification                                                                                                                                                                                                                                                                                                                                                                                                                                                                                                                                                                                                                                                                                                                                                      | -0.094 (-0.167,-0.021)     | 0.012   | -0.085 (-0.153,-0.017)     | 0.015   |
| Working hours                                                                                                                                                                                                                                                                                                                                                                                                                                                                                                                                                                                                                                                                                                                                                              |                            |         | -0.003 (-0.005,-0.001)     | 0.007   |
| Avg. patient caseload                                                                                                                                                                                                                                                                                                                                                                                                                                                                                                                                                                                                                                                                                                                                                      |                            |         | 0.000 (-0.004,0.004)       | 0.984   |
| Run camps                                                                                                                                                                                                                                                                                                                                                                                                                                                                                                                                                                                                                                                                                                                                                                  |                            |         | 0.015 (-0.083,0.113)       | 0.758   |
| Public Health facility                                                                                                                                                                                                                                                                                                                                                                                                                                                                                                                                                                                                                                                                                                                                                     |                            |         | -0.219 (-0.261,-0.176)     | 0.000   |
| Clinic's level of cleanliness                                                                                                                                                                                                                                                                                                                                                                                                                                                                                                                                                                                                                                                                                                                                              |                            |         | 0.052 (0.008,0.096)        | 0.021   |
| Knowledge Score                                                                                                                                                                                                                                                                                                                                                                                                                                                                                                                                                                                                                                                                                                                                                            |                            |         | 0.007 (-0.020,0.034)       | 0.625   |
| <p><b>Notes:</b> Experience variable accounts for the years of experience of the provider as a medical practitioner. Medically Qualified providers include those with any formal medical degree (MBBS, BAMS, BUMS, BHMS degrees as well as Diploma in Ayurvedic and some others MD degrees). Working hours is the total number of hours the provider works in the facility in a week. Average patient caseload is the average of the number of patients the providers report to attend in a day in winter, summer and post- monsoon period. Knowledge score is based on providers' responses to 12 key questions listed in eTable 1. †Adjusted for the time and day of the week of the consultation. Sources: SPP Exit Interview, Vignette and Provider Questionnaire.</p> |                            |         |                            |         |

**eTable 6. Knowledge score and practitioner characteristics on item response theory (IRT) performance score**

|                                                                                                                                                                                                                                                                                                                                                                                                                                                                                                                                                                                                                                                                                                                                                                    | Estimated effect (95% CI)† | p value | Estimated effect (95% CI)† | p value |
|--------------------------------------------------------------------------------------------------------------------------------------------------------------------------------------------------------------------------------------------------------------------------------------------------------------------------------------------------------------------------------------------------------------------------------------------------------------------------------------------------------------------------------------------------------------------------------------------------------------------------------------------------------------------------------------------------------------------------------------------------------------------|----------------------------|---------|----------------------------|---------|
| <b>Panel A: Diarrhea</b>                                                                                                                                                                                                                                                                                                                                                                                                                                                                                                                                                                                                                                                                                                                                           |                            |         |                            |         |
| Age [20,29]                                                                                                                                                                                                                                                                                                                                                                                                                                                                                                                                                                                                                                                                                                                                                        | 0.483 (-0.118,1.084)       | 0.114   | 0.399 (-0.189,0.987)       | 0.181   |
| Age [40,49]                                                                                                                                                                                                                                                                                                                                                                                                                                                                                                                                                                                                                                                                                                                                                        | 0.133 (-0.343,0.608)       | 0.580   | 0.152 (-0.292,0.595)       | 0.498   |
| Age [50,59]                                                                                                                                                                                                                                                                                                                                                                                                                                                                                                                                                                                                                                                                                                                                                        | 0.175 (-0.378,0.728)       | 0.530   | 0.127 (-0.426,0.679)       | 0.649   |
| Age [60+]                                                                                                                                                                                                                                                                                                                                                                                                                                                                                                                                                                                                                                                                                                                                                          | 0.490 (-0.252,1.233)       | 0.192   | 0.313 (-0.419,1.045)       | 0.397   |
| Experience                                                                                                                                                                                                                                                                                                                                                                                                                                                                                                                                                                                                                                                                                                                                                         | -0.007 (-0.028,0.014)      | 0.508   | -0.003 (-0.024,0.018)      | 0.767   |
| Medical Qualification                                                                                                                                                                                                                                                                                                                                                                                                                                                                                                                                                                                                                                                                                                                                              | 0.226 (-0.148,0.601)       | 0.233   | 0.327 (-0.106,0.759)       | 0.137   |
| Working hours                                                                                                                                                                                                                                                                                                                                                                                                                                                                                                                                                                                                                                                                                                                                                      |                            |         | -0.012 (-0.021,-0.004)     | 0.004   |
| Avg. patient caseload                                                                                                                                                                                                                                                                                                                                                                                                                                                                                                                                                                                                                                                                                                                                              |                            |         | -0.019 (-0.036,-0.002)     | 0.030   |
| Run camps                                                                                                                                                                                                                                                                                                                                                                                                                                                                                                                                                                                                                                                                                                                                                          |                            |         | 0.229 (-0.461,0.920)       | 0.510   |
| Public Health facility                                                                                                                                                                                                                                                                                                                                                                                                                                                                                                                                                                                                                                                                                                                                             |                            |         | -0.601 (-1.467,0.265)      | 0.171   |
| Clinic's level of cleanliness                                                                                                                                                                                                                                                                                                                                                                                                                                                                                                                                                                                                                                                                                                                                      |                            |         | -0.038 (-0.285,0.210)      | 0.762   |
| Knowledge Score                                                                                                                                                                                                                                                                                                                                                                                                                                                                                                                                                                                                                                                                                                                                                    |                            |         | 0.137 (-0.010,0.283)       | 0.066   |
| <b>Panel B: Pneumonia</b>                                                                                                                                                                                                                                                                                                                                                                                                                                                                                                                                                                                                                                                                                                                                          |                            |         |                            |         |
| Age [20,29]                                                                                                                                                                                                                                                                                                                                                                                                                                                                                                                                                                                                                                                                                                                                                        | -0.553 (-1.180,0.074)      | 0.083   | -0.519 (-1.200,0.163)      | 0.134   |
| Age [40,49]                                                                                                                                                                                                                                                                                                                                                                                                                                                                                                                                                                                                                                                                                                                                                        | 0.010 (-0.433,0.452)       | 0.965   | 0.036 (-0.416,0.487)       | 0.876   |
| Age [50,59]                                                                                                                                                                                                                                                                                                                                                                                                                                                                                                                                                                                                                                                                                                                                                        | 0.270 (-0.390,0.931)       | 0.418   | 0.338 (-0.347,1.022)       | 0.329   |
| Age [60+]                                                                                                                                                                                                                                                                                                                                                                                                                                                                                                                                                                                                                                                                                                                                                          | 0.358 (-0.355,1.072)       | 0.320   | 0.231 (-0.575,1.038)       | 0.569   |
| Experience                                                                                                                                                                                                                                                                                                                                                                                                                                                                                                                                                                                                                                                                                                                                                         | -0.019 (-0.044,0.006)      | 0.135   | -0.020 (-0.047,0.006)      | 0.133   |
| Medical Qualification                                                                                                                                                                                                                                                                                                                                                                                                                                                                                                                                                                                                                                                                                                                                              | -0.592 (-1.121,-0.063)     | 0.029   | -0.519 (-1.048,0.011)      | 0.055   |
| Working hours                                                                                                                                                                                                                                                                                                                                                                                                                                                                                                                                                                                                                                                                                                                                                      |                            |         | -0.015 (-0.025,-0.004)     | 0.009   |
| Avg. patient caseload                                                                                                                                                                                                                                                                                                                                                                                                                                                                                                                                                                                                                                                                                                                                              |                            |         | 0.003 (-0.022,0.028)       | 0.795   |
| Run camps                                                                                                                                                                                                                                                                                                                                                                                                                                                                                                                                                                                                                                                                                                                                                          |                            |         | -0.028 (-0.679,0.622)      | 0.931   |
| Public Health facility                                                                                                                                                                                                                                                                                                                                                                                                                                                                                                                                                                                                                                                                                                                                             |                            |         | -1.867 (-2.603,-1.132)     | 0.000   |
| Clinic's level of cleanliness                                                                                                                                                                                                                                                                                                                                                                                                                                                                                                                                                                                                                                                                                                                                      |                            |         | 0.301 (0.052,0.550)        | 0.019   |
| Knowledge Score                                                                                                                                                                                                                                                                                                                                                                                                                                                                                                                                                                                                                                                                                                                                                    |                            |         | 0.050 (-0.110,0.210)       | 0.535   |
| <b>Notes:</b> Experience variable accounts for the years of experience of the provider as a medical practitioner. Medically Qualified providers include those with any formal medical degree (MBBS, BAMS, BUMS, BHMS degrees as well as Diploma in Ayurvedic and some others MD degrees). Working hours is the total number of hours the provider works in the facility in a week. Average patient caseload is the average of the number of patients the providers report to attend in a day in winter, summer and post-monsoon period. Knowledge score is based on providers' responses to 12 key questions listed in eTable 1. †Adjusted for the time and day of the week of the consultation. Sources: SPP Exit Interview, Vignette and Provider Questionnaire. |                            |         |                            |         |



**eFigure 1. Consultation time**

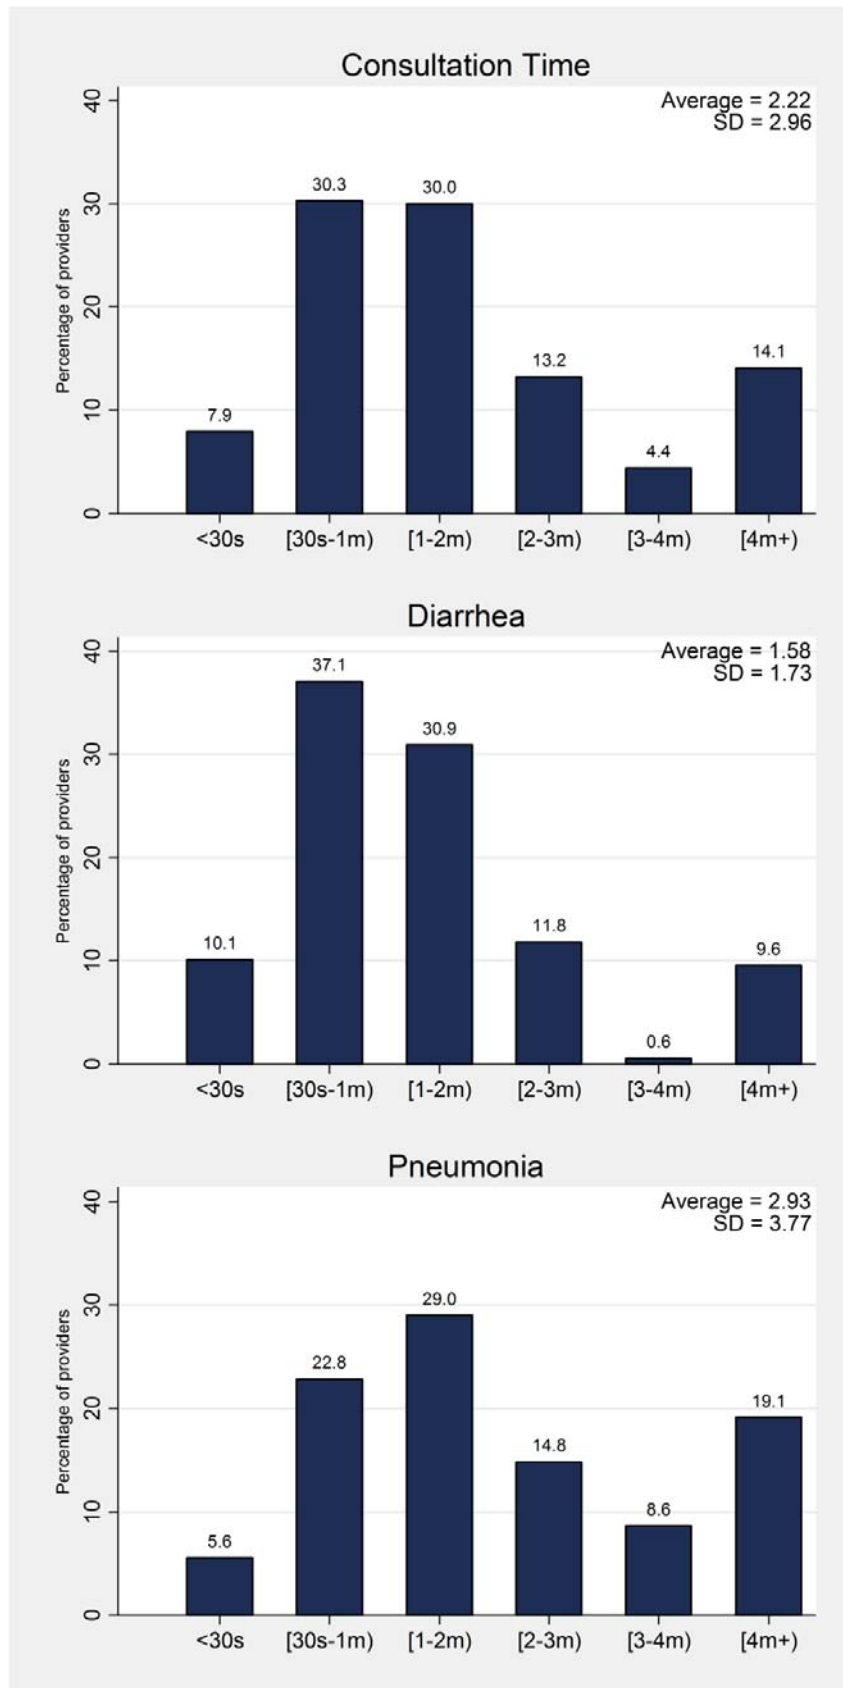

**eFigure 2. Know-do gap: share of practitioners who asked key diagnostic questions on the standardized patients (SPs) and vignettes**

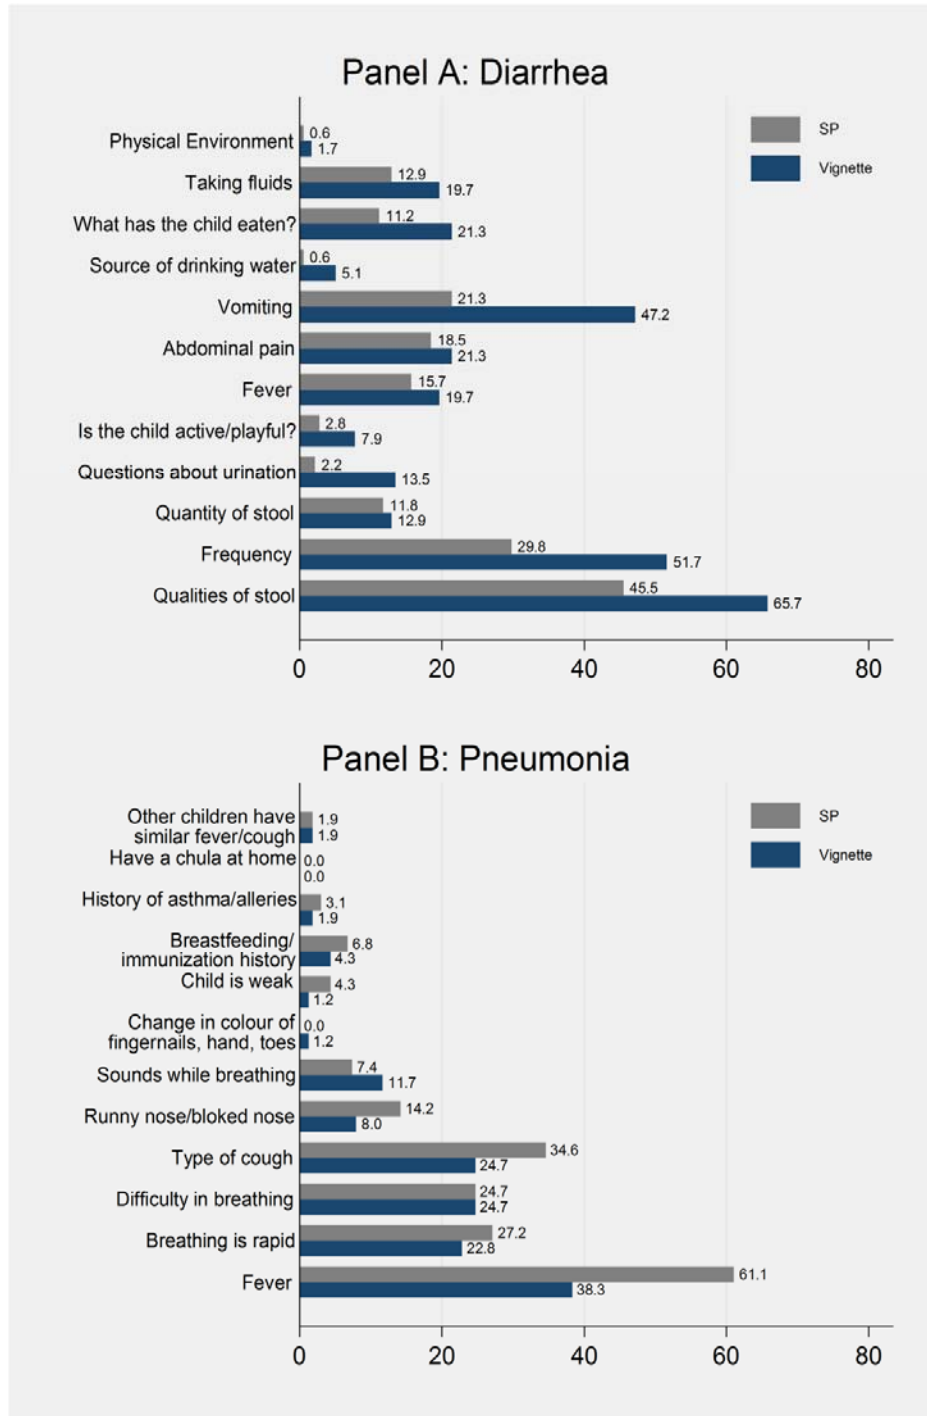

**Notes:** Panel A includes those providers in vignette that were also observed in the SP instrument for the diarrhea case (obs. 178). Panel B includes those providers in vignette that were also observed in the SP instrument for the pneumonia case (obs. 162).
